# Supplementary material
Source: Springer Nature journal article supplement (https://www.springermedizin.de/resource/supplementary/12992_2012_198_MOESM3_ESM.pdf/9616664)
Supplement: MOESM3 [file 9616664]

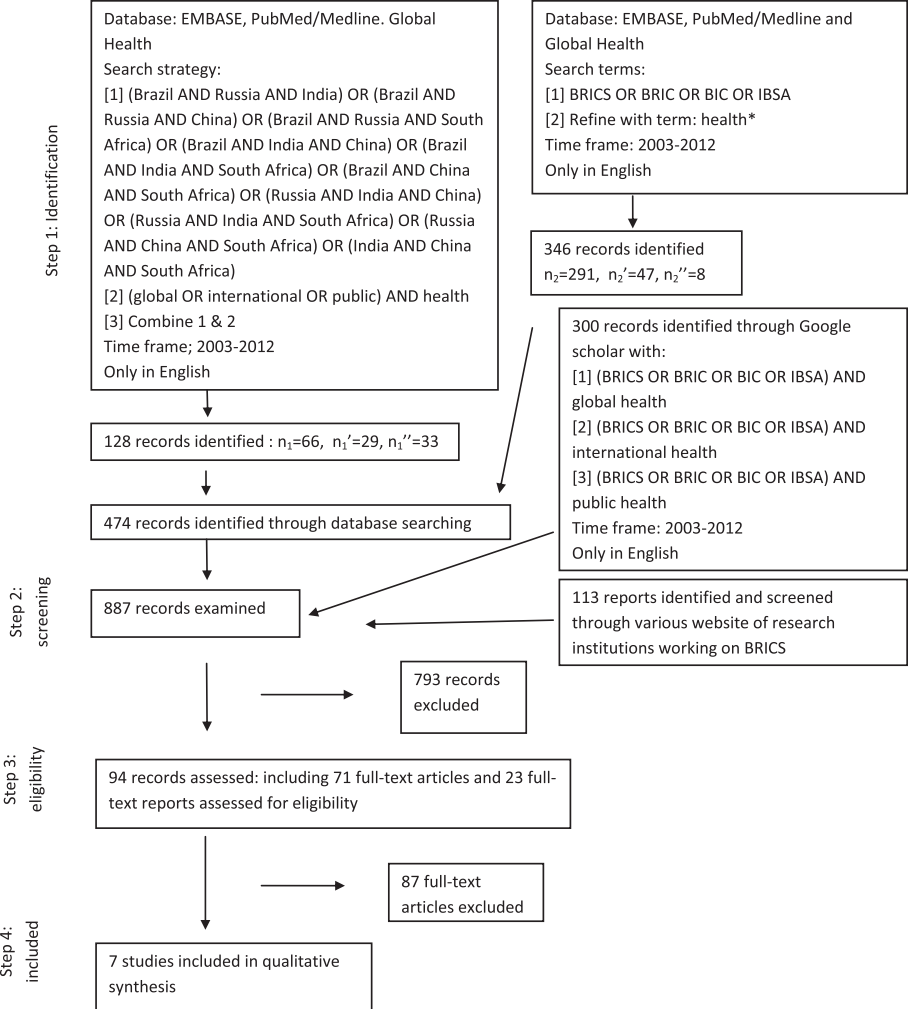

Note:  $n, n', n''$  represent the search result for EMBASE, PubMed/Medline and Global Health, respectively.
